# Supplementary material for: Scalable Graphene Defect Prediction Using Transferable Learning
Source: MDPI journal article supplement (doi:10.3390/nano11092341), 2021-09-09
Supplement: s1 [file s1]

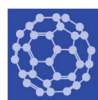

# Scalable Graphene Defect Prediction Using Transferable Learning

Bowen Zheng<sup>1</sup>, Zeyu Zheng<sup>2</sup> and Grace X. Gu<sup>1,\*</sup>

<sup>1</sup> Department of Mechanical Engineering, University of California, Berkeley, Berkeley, CA 94720, USA

<sup>2</sup> Department of Industrial Engineering and Operations Research, University of California, Berkeley, Berkeley, CA 94720, USA

\* Correspondence: ggu@berkeley.edu

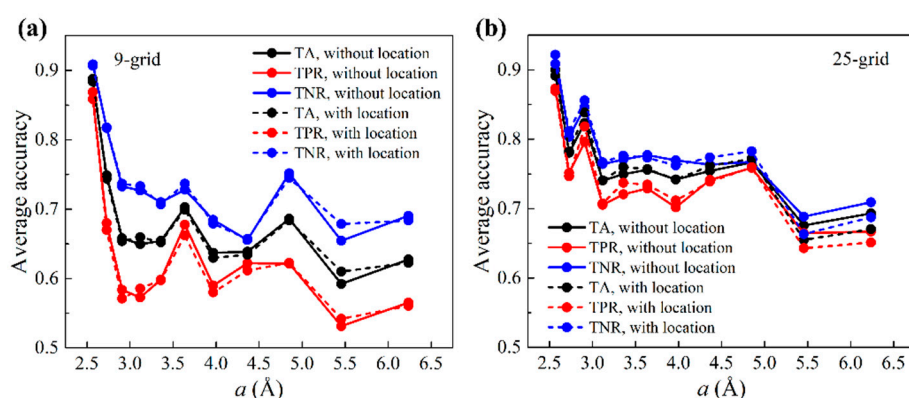

**Figure S1.** Validation accuracies with and without query point locations. (a) 9-grid and (b) 25-grid approaches.

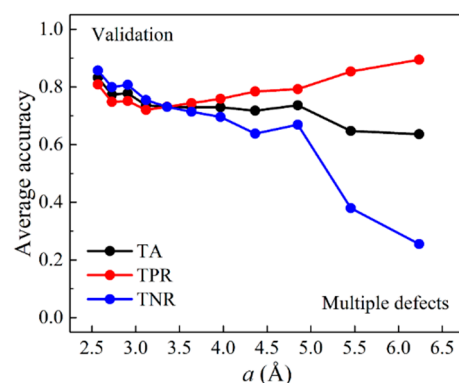

**Figure S2.** Validation accuracies of multiple-defect graphene sheets.

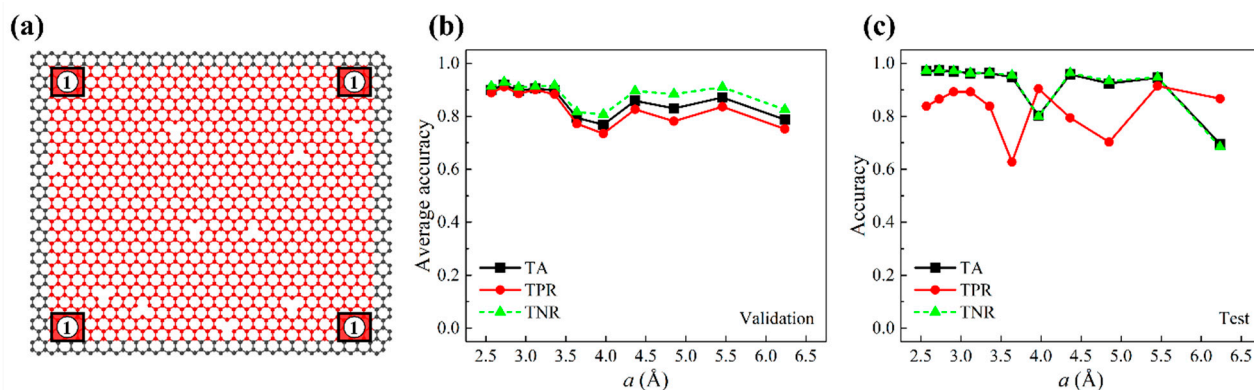

**Figure S3.** Validation and test accuracies of Type 1 near-edge/-corner defects. The length of feature vectors is 9.  
(a) Illustration of Type 1 near-edge/-corner defects. (b) Validation and (c) test accuracies.

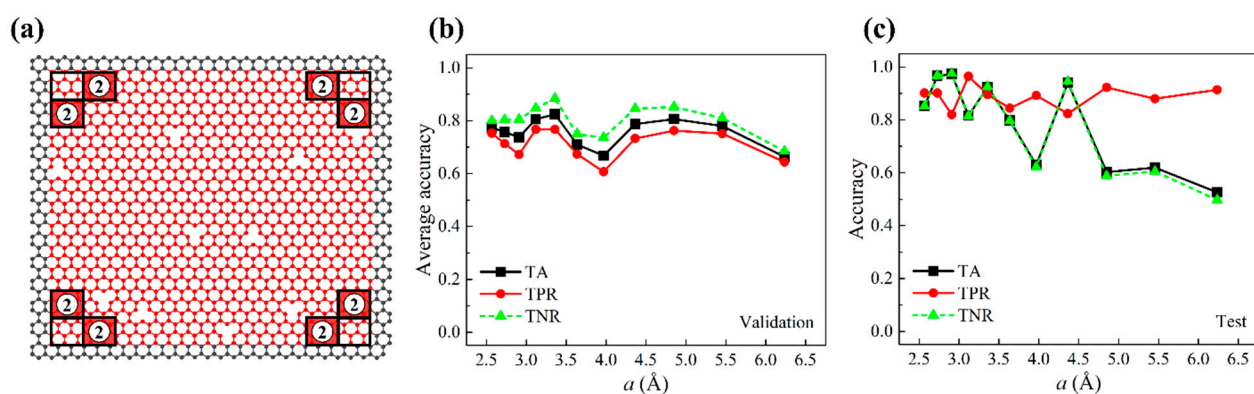

**Figure S4.** Validation and test accuracies of Type 2 near-edge/-corner defects. The length of feature vectors is 12.  
(a) Illustration of Type 2 near-edge/-corner defects. (b) Validation and (c) test accuracies.

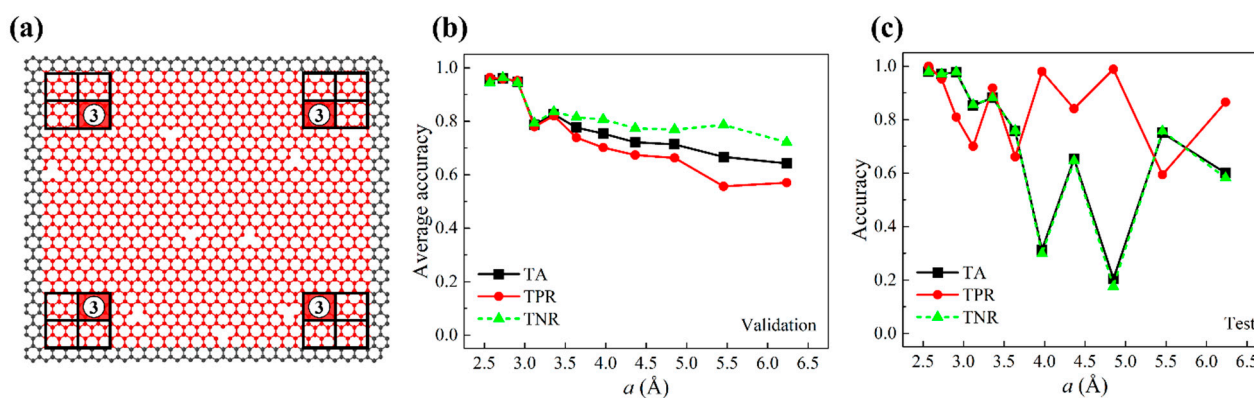

**Figure S5.** Validation and test accuracies of Type 3 near-edge/-corner defects. The length of feature vectors is 16.  
(a) Illustration of Type 3 near-edge/-corner defects. (b) Validation and (c) test accuracies.

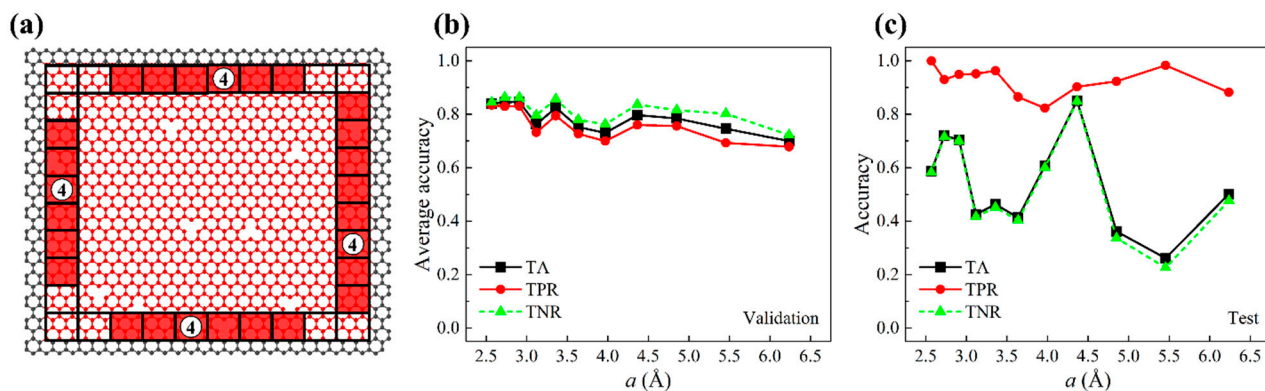

**Figure S6.** Validation and test accuracies of Type 4 near-edge/-corner defects. The length of feature vectors is 15.  
(a) Illustration of Type 4 near-edge/-corner defects. (b) Validation and (c) test accuracies.

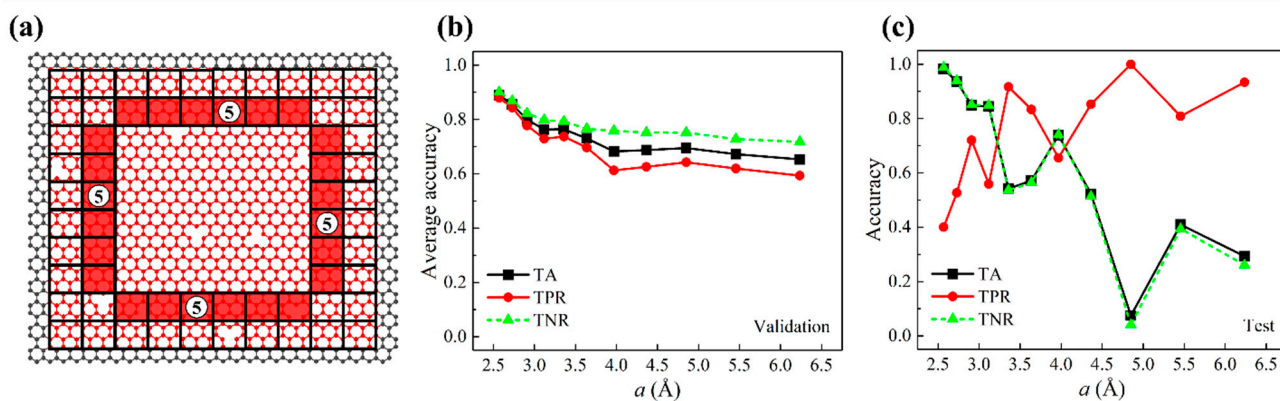

**Figure S7.** Validation and test accuracies of Type 5 near-edge/-corner defects. The length of feature vectors is 20.  
(a) Illustration of Type 5 near-edge/-corner defects. (b) Validation and (c) test accuracies.

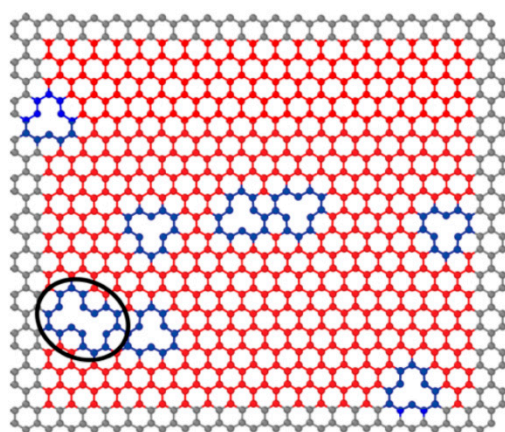

**Figure S8.** An example of graphene sheet that contains a larger defect (circled).
